# Supplementary material for: ECL performance of ruthenium tris-bipyridyl complexes covalently linked with phenothiazine through different bridge
Source: Royal Society of Chemistry journal article supplement (doi:10.1039/c0dt00279h), 2010-01-01
Supplement: c0dt00279h.pdf [file c0dt00279h.pdf]

**Supporting Information for**  
**ECL Performance of Ruthenium *tris*-Bipyridyl Complexes**  
**Covalently Linked with Phenothiazine through Different Bridge**

**Shiguo Sun,<sup>\*a</sup> Yang Yang,<sup>a</sup> Fengyu Liu,<sup>b</sup> Jiangli Fan,<sup>a</sup> Jan Kehr,<sup>a,c</sup> Licheng Sun,<sup>\*d</sup> and Xiaojun Peng<sup>\*a</sup>**

<sup>a</sup> *State Key Laboratory of Fine Chemicals, Dalian University of Technology, 158 Zhongshan Road, Xigang District, Dalian 116012, China, Fax & Tel: +86 411 39893906, E-mail: shiguo@dlut.edu.cn*

<sup>b</sup> *State Key Laboratory of Fine Chemicals, School of Chemistry, Dalian University of Technology, 2 Linggong Road, Ganjingzi District, Dalian 116023, China*

<sup>c</sup> *Department of Physiology and Pharmacology, Pharmacological Neurochemistry, Karolinska Institutet, 171 77 Stockholm, Sweden*

<sup>d</sup> *Department of Chemistry, Organic Chemistry, Royal Institute of Technology(KTH), Teknikringen 30, 100 44 Stockholm, Sweden*

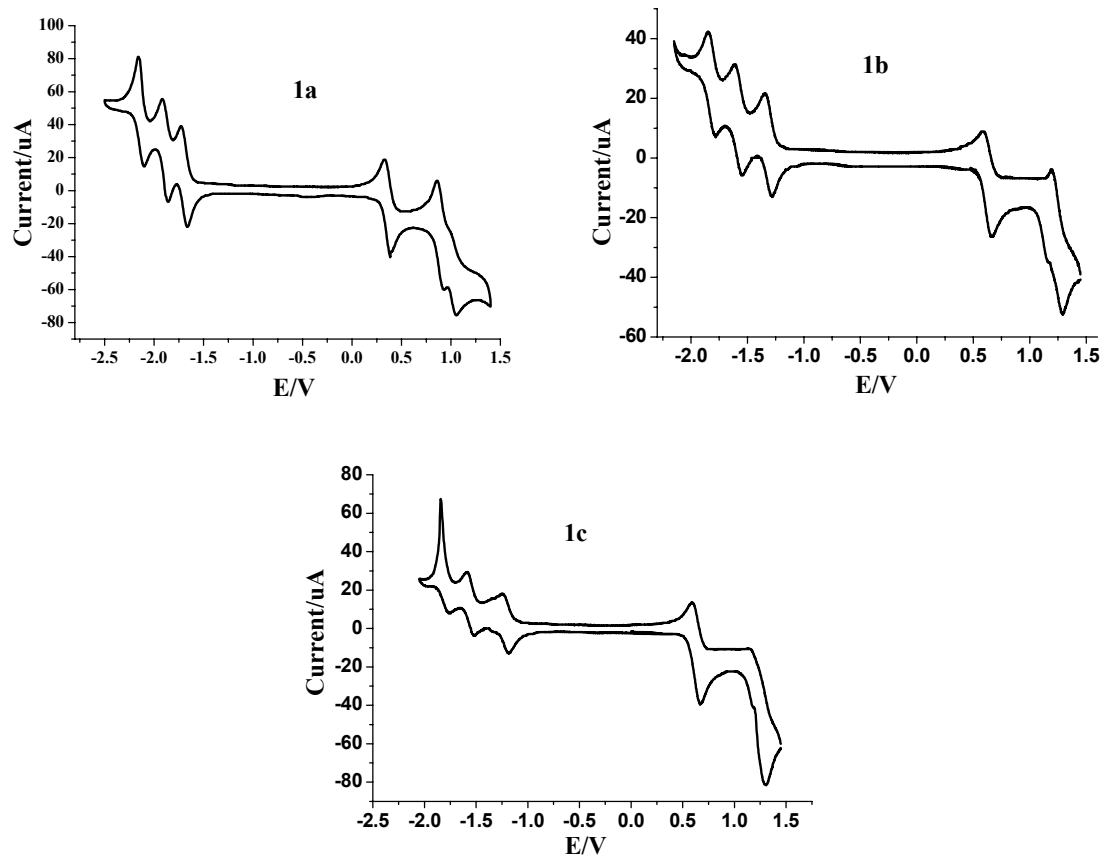

**Figure S1.** Cyclic voltammograms of complexes **1** alone in CH<sub>3</sub>CN with 0.1 M N(n-C<sub>4</sub>H<sub>9</sub>)<sub>4</sub>PF<sub>6</sub>, Scan rate:  $\nu = 100 \text{ mV s}^{-1}$ .

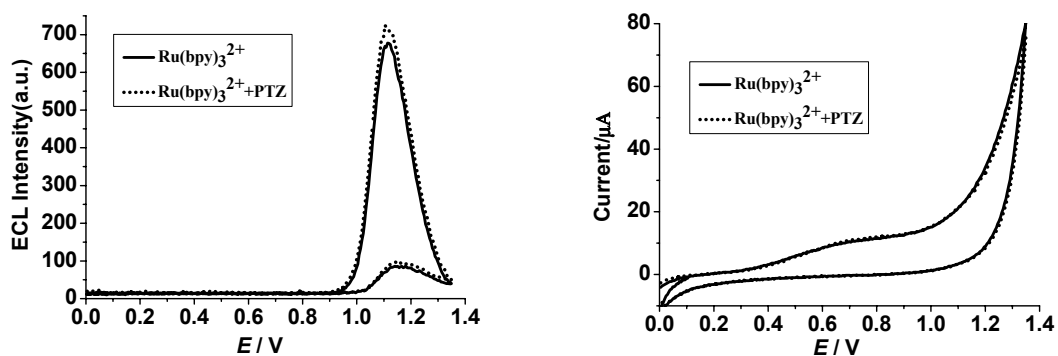

**Figure S2** Cyclic ECL (left) and voltammetric curves (right) of 1  $\mu\text{M}$   $\text{Ru}(\text{bpy})_3^{2+}$  with 5 mM TPrA (solid) and 1  $\mu\text{M}$   $\text{Ru}(\text{bpy})_3^{2+}$ +1  $\mu\text{M}$  PTZ with 5 mM TPrA (dot) in 0.1 M phosphate buffer (pH = 7.5) at Pt electrode, Scan rate: 0.1 V/s.

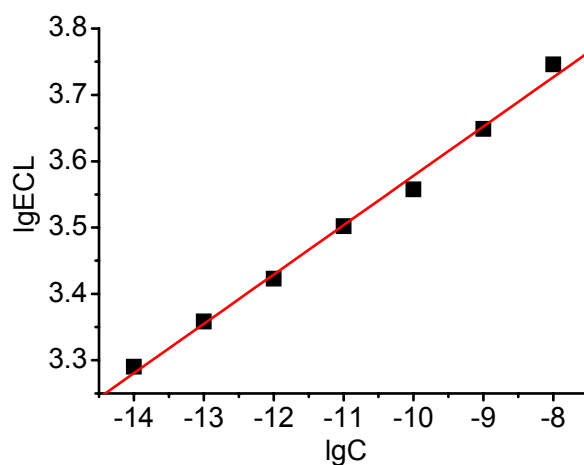

**Figure S3** Dependence of the logarithmic plot of ECL versus the concentration of complex **1a** with 20 mM DBAE in 0.1 M phosphate buffer (pH = 7.5) at Au electrode.
